# Supplementary material for: Optical and grain boundary potential characteristics of sulfurized BiFeO3 thin films for photovoltaic applications
Source: Royal Society of Chemistry journal article supplement (doi:10.1039/c5dt04585a), 2016-01-01
Supplement: c5dt04585a1.pdf [file c5dt04585a1.pdf]

## Supplementary Information

### Optical and grain boundary potential characteristics of sulfurized BiFeO<sub>3</sub> thin films for photovoltaic applications

Seung Min Lee and Yong Soo Cho\*

#### I. XRD patterns of sulfurized films in the 2θ range of 20° to 60°

The disappearance of perovskite BiFeO<sub>3</sub> peaks and the appearance of Bi<sub>2</sub>S<sub>3</sub> phase are prominent with the progress of sulfurization at high temperatures. The close comparison of the 400 °C pattern with that of Bi<sub>2</sub>S<sub>3</sub> phase suggests that any other phase did not form as a major phase. It is very interesting that the Fe-involved phase could not be found as crystalline phase.

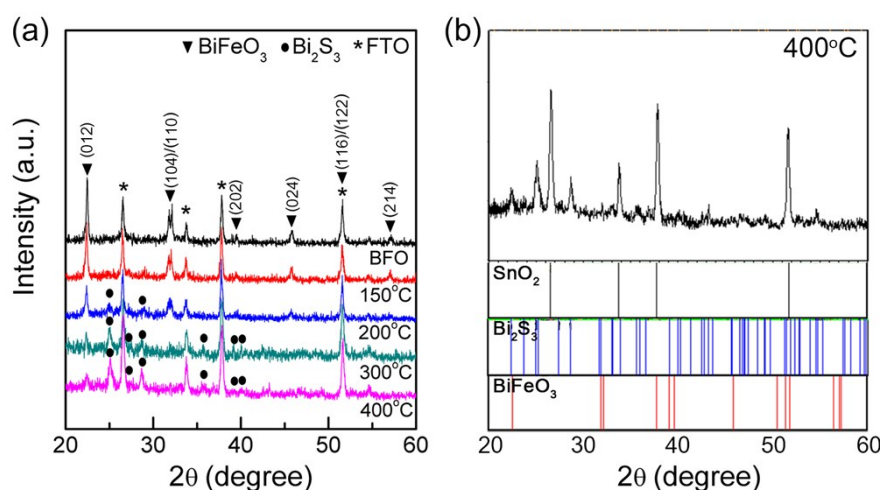

Fig. S1. (a) XRD patterns of BiFeO<sub>3</sub> and sulfurized BiFeO<sub>3</sub> thin films at different sulfurization temperatures, and (b) only the pattern of 400 °C sample with matched JCPDS peaks of each phase

#### II. XPS spectra of Fe 2p states

Detailed analysis results of the oxidation state of Fe are shown below. Note that Fe<sup>2+</sup> state was observed in the unsulfurized BFO thin film. It is noticeable that the fitted area of Fe<sup>3+</sup> state decreased with increasing sulfurization temperature. Based on the calculated fitted peak areas for Fe<sup>3+</sup> and Fe<sup>2+</sup>, concentration ratios of Fe<sup>3+</sup>:Fe<sup>2+</sup> in the BFO, 150 °C and 200 °C films were 89:11, 82:18 and 76:24, respectively, indicating that the presence of Fe<sup>2+</sup> ions became significant with the progress of sulfurization. It is clear that the sulfurization produced the change of the oxidation state of iron, potentially supporting the existence of complex Bi-Fe(III)-Fe(II)-S-O compounds.

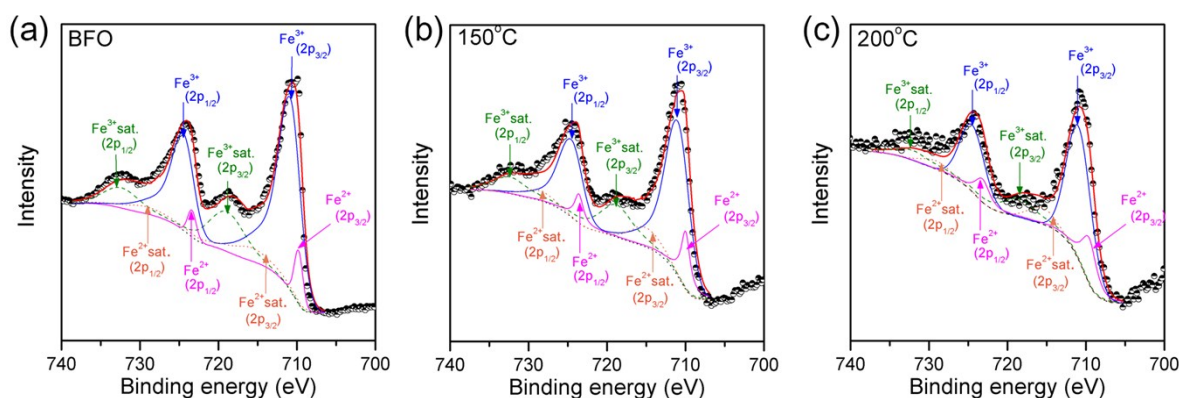

Fig. S2. XPS spectra of unsulfurized and 150 °C- and 200 °C- sulfurized BFO thin films in the Fe 2p binding energy region

### III. Detailed XPS depth analyses

Additional XPS analyses were investigated by characterizing chemical states with film depth from the surface. Ar<sup>+</sup>-sputtering of the 200 °C-sulfurized sample was performed progressively from 0 second up to a few thousands seconds until all film part was eliminated. The resultant XPS spectra of the Fe 2p, Bi 4f and S 2s states with the sputter etching time are seen below. The Sn 3p peak observed in the Fe 2p XPS spectra (left) above 2,655 sec came from the F:SnO<sub>2</sub>-coated glass substrate used here, indicating that all films were etched upon Ar<sup>+</sup>-sputtering. Thus we can calculate the etching rate using the known thickness of film. As a result, the etching rate is approximately 0.1 nm/s.

The Bi 4f peaks in the middle spectra below tend to shift toward higher binding energies with increasing etching time. It seems that the Bi-S bonds from the surface are gradually transformed to the Bi-O bonds. The shoulders at ~157 and ~163 eV (marked with \*) are attributed to the metallic bismuth state since Ar ion sputtering changes considerably Bi<sup>3+</sup> ions into Bi<sup>0</sup> due to weak Bi-O bonds as reported in literature: Zhang et al., *Appl. Surf. Sci.* 257 (2011) 7461 and Jocalekic et al., *J. Alloy. Compd.* 469 (2009) 441. From the S 2s spectra (right), the existence of sulfur was also confirmed up to a certain etching time. Although the XPS depth profiles do not suggest actual compositions, the existence of sulfur from the film surface is again confirmed.

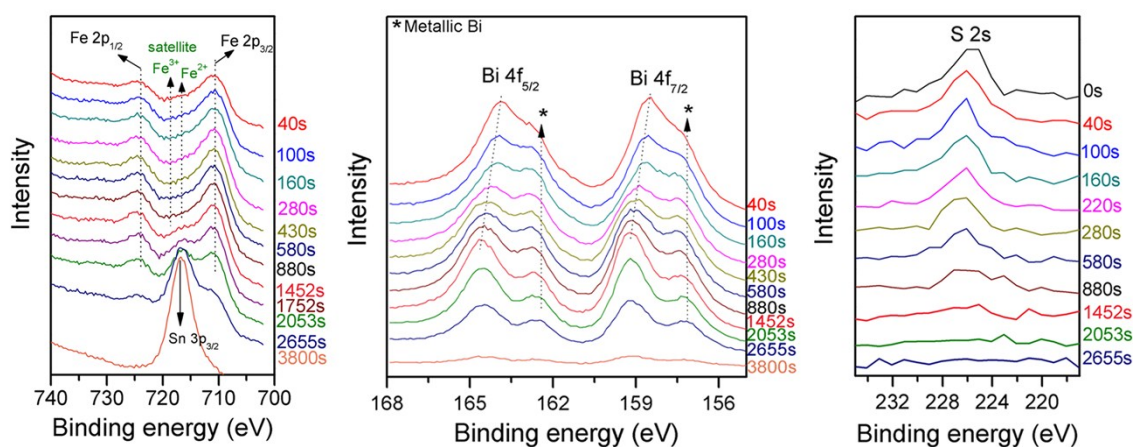

Fig. S3. Etching time-dependent XPS spectra of 200 °C-sulfurized BFO thin films in the binding energy regions corresponding to Fe 2p (left), Bi 4f (middle) and S 2s (right) peaks
